# Supplementary material for: Pyochelin biotransformation by Staphylococcus aureus shapes bacterial competition with Pseudomonas aeruginosa in polymicrobial infections
Source: PubMed Central journal article supplement — Cell Rep. Author manuscript; Available in PMC 2023 Oct 23. (PMC10592502; doi:10.1016/j.celrep.2023.112540), 2023-05-24
Supplement: NIHMS1912764-supplement-1.pdf [file NIHMS1912764-supplement-1.pdf]

Cell Reports, Volume 42

**Supplemental information**

**Pyochelin biotransformation by *Staphylococcus aureus* shapes bacterial competition with *Pseudomonas aeruginosa* in polymicrobial infections**

**Christian Jenul, Klara C. Keim, Justin N. Jens, Michael J. Zeiler, Katrin Schilcher, Michael J. Schurr, Christian Melander, Vanessa V. Phelan, and Alexander R. Horswill**

**A**

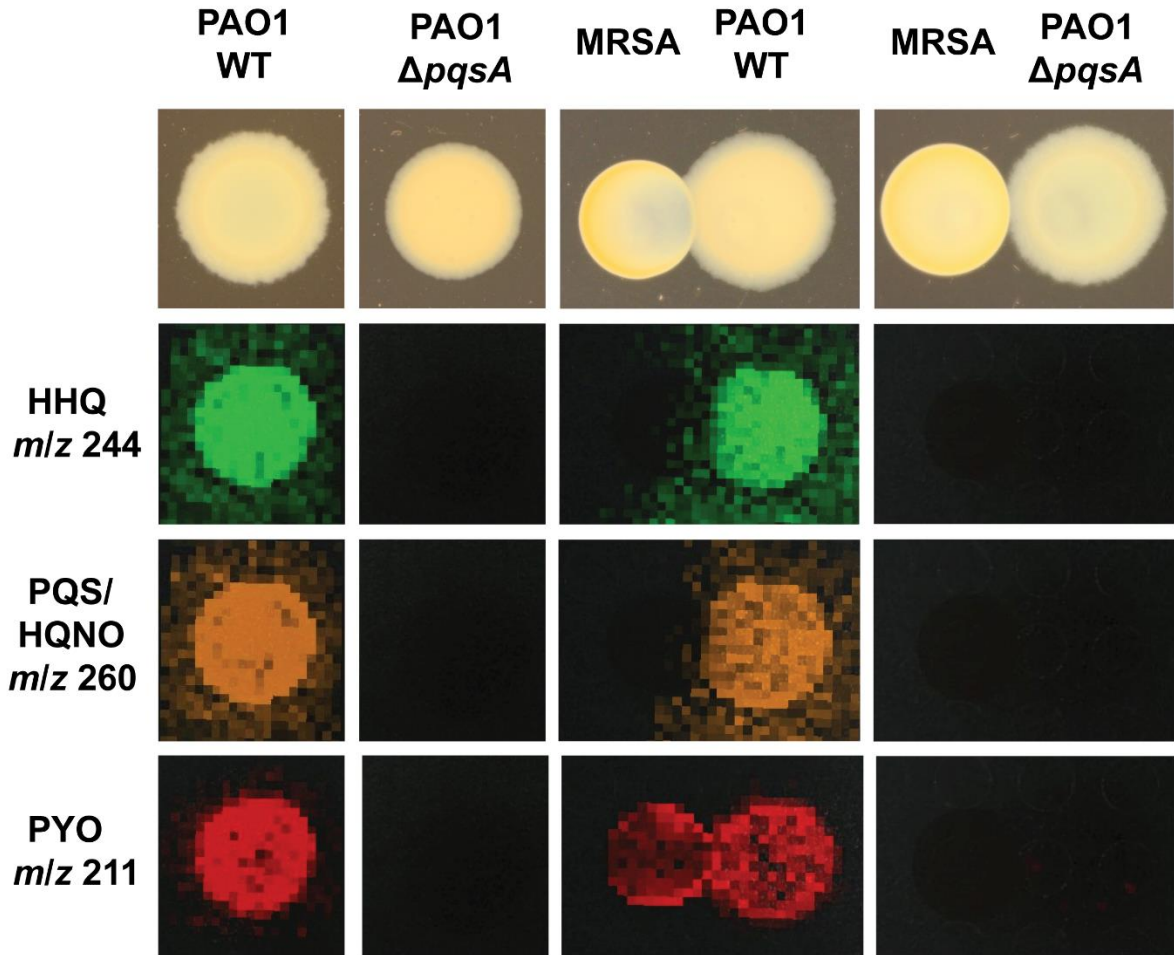

**B**

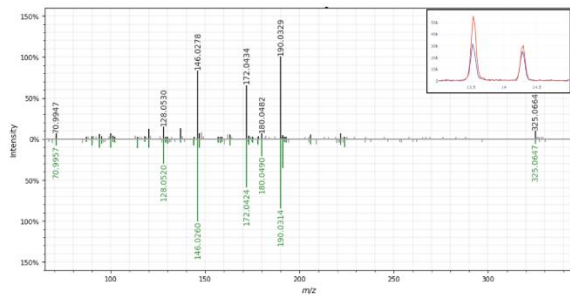

**C**

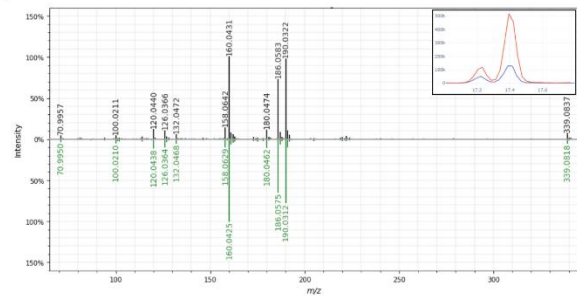

1

2 **Figure S1:** *P. aeruginosa* derived quinolones and pyocyanin drive killing of *S. aureus*.

3 Related to Figure 1. A) MALDI-MSI of *S. aureus* and *P. aeruginosa* grown as

4 monocultures or interactions. Photographs of the cultures are shown on top. The second

5 to fourth rows show the false colored *m/z* distribution for HHQ (*m/z* 244), PQS/HQNO

6 ( $m/z$  260) and pyocyanin (PYO;  $m/z$  211). *P. aeruginosa* wildtype (PAO1 WT) but not a  
7 *P. aeruginosa* quinolone mutant (PAO1  $\Delta pqsA$ ) produces the alkyl-quinolones HHQ and  
8 PQS/HQNO as well as the quinolone regulated metabolite PYO. **B and C**) Mirror plots  
9 comparing the MS<sup>2</sup> spectrum of isolated (top; black trace) and synthetic (bottom; green  
10 trace) **B**) pyochelin and **C**) pyochelin methyl ester. Chromatogram traces of isolated (blue)  
11 and synthetic (red) metabolites are shown as inlays.

12

13

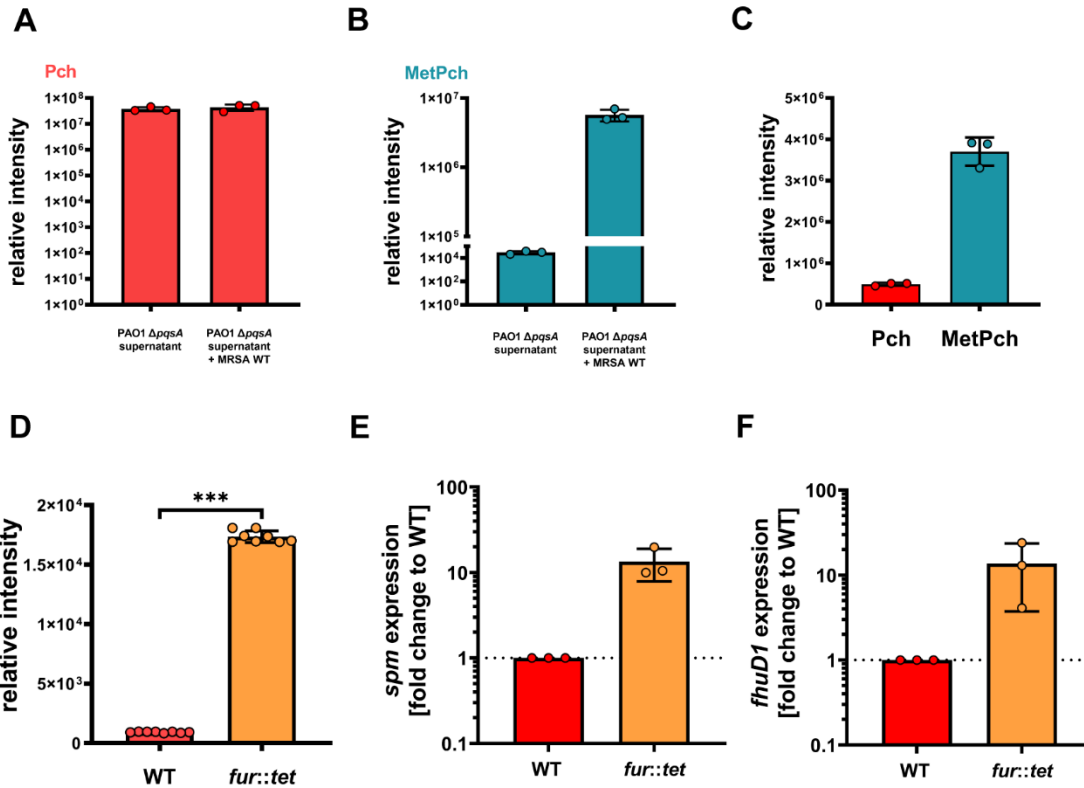

14  
 15 **Figure S2:** Metabolite quantification and *spm* regulation. Related to Figure 3.  
 16 Quantification of **A)** Pch and **B)** MetPch in PAO1  $\Delta pqsA$  cell free SN after incubation with  
 17 TSB (PAO1  $\Delta pqsA$  supernatant) or MRSA overnight culture (PAO1  $\Delta pqsA$  supernatant +  
 18 MRSA WT) for 8h. **C)** Equimolar amounts of synthetic Pch and MetPch quantified by LC-  
 19 MS. MetPch shows a 10-fold higher signal intensity than Pch, most likely due to more  
 20 efficient ionization. **D)** The FhuD1/Smt promoter activity is elevated in a *fur* mutant  
 21 (*fur::tet*) compared to its parent strain (WT). Expression of **E)** *spm* and **F)** *fhuD1* are  
 22 elevated in a *fur* mutant (*fur::tet*) compared to its parent strain (WT). **A – C, E, F)**  $n = 3$   
 23 biological replicates **D)**  $n = 8$  biological replicates. Values are mean  $\pm$  SDs \*\*\* $P \leq 0.001$   
 24 [Mann Whitney U test].

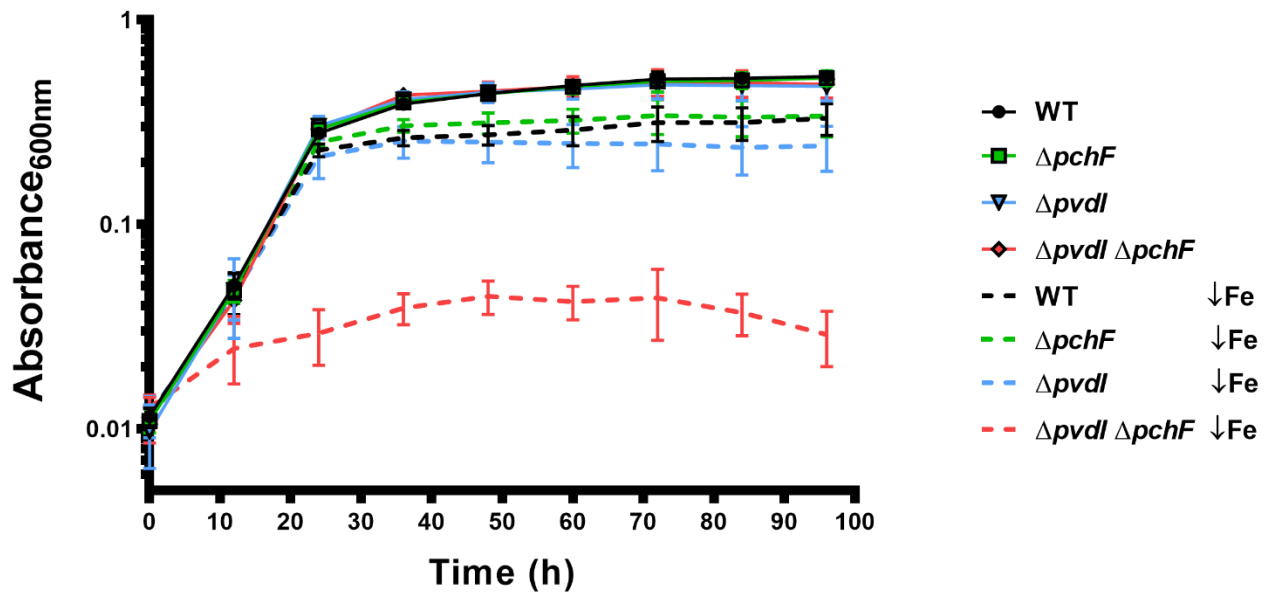

26

27 **Figure S3:** Siderophore biosynthesis is essential for growth under iron limited conditions.

28 Related to Figure 3. 96-hour growth curves of *P. aeruginosa* PAO1 wild type (WT), a

29 pyochelin mutant ( $\Delta pchF$ ), a pyoverdine mutant ( $\Delta pvdI$ ) and a mutant deficient in

30 production of both siderophores ( $\Delta pchF \Delta pvdI$ ). Cultures were grown in M9 minimal

31 medium with glycerol as carbon source. To create a low iron environment ( $\downarrow Fe$ ), 500  $\mu M$

32 2,2'-Bipyridine was added to the growth medium. Growth curves of bacteria grown in

33 standard M9 medium are shown as full lines and growth curves from low iron environment

34 are shown as dashed lines.  $n = 5$  biological replicates from two independent experiments.

35

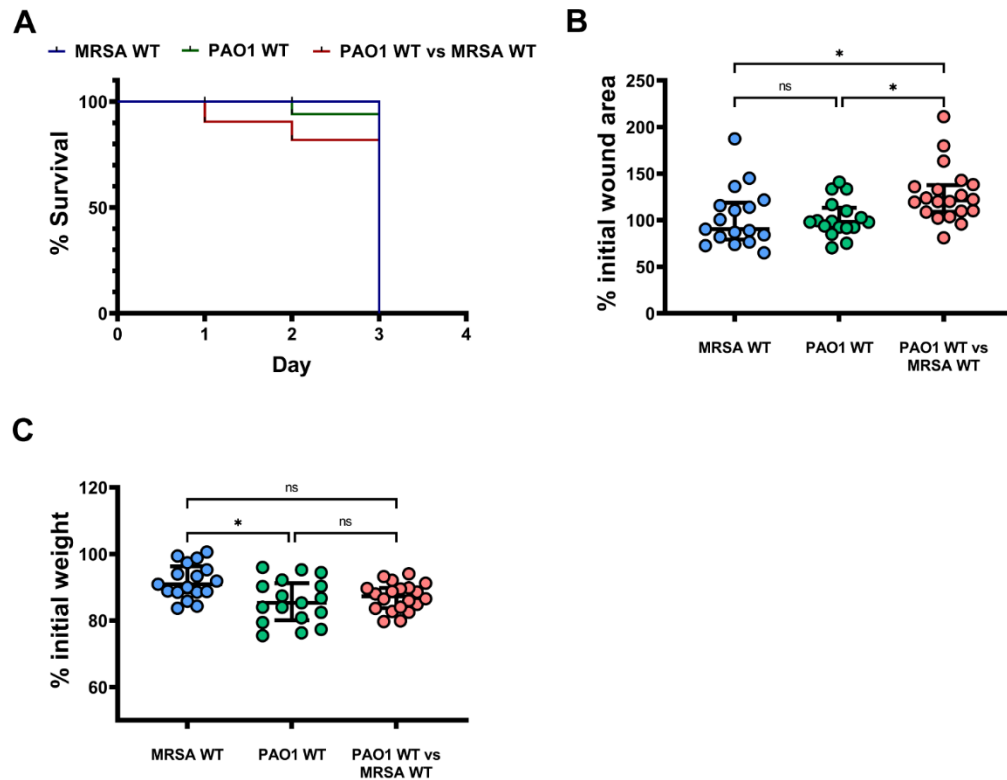

36

37 **Figure S4:** Polymicrobial infection leads to increased mortality and wound size  
 38 progression. Related to Figures 4 and 5. **A)** Murine survival after skin wound infection  
 39 with either *S. aureus* LAC wild type (MRSA WT) or *P. aeruginosa* PAO1 wild type (PAO1  
 40 WT) or co-infection (PAO1 WT vs MRSA WT). Co-infections lead to lowered murine  
 41 survival compared with single infections. **B)** The change in murine skin wound size area  
 42 between start and end of the experiment. Changes were calculated from the measured  
 43 wound size area before bacterial infection and at the endpoint of the murine skin wound  
 44 model. The changes are expressed as percent (%) of the initial wound size area at the  
 45 endpoint of the experiment. **C)** The change in murine weight between start and end of  
 46 the experiment. Changes were calculated from the murine weight before bacterial  
 47 infection and at the endpoint of the murine skin wound model. The changes are expressed  
 48 as percent (%) of the initial murine weight at the endpoint of the experiment. **A)** n = 17

49 biological replicates from 3 independent experiments. **B - C**)  $n =$  at least 17 biological  
50 replicates from 3 independent experiments. [Kruskal-Wallis with Dunn's multiple  
51 comparison]. Values are median  $\pm$  interquartile range. Each dot represents values from a  
52 single mouse. \* $P \leq 0.05$ , \*\* $P \leq 0.01$ , \*\*\* $P \leq 0.001$ , \*\*\*\* $P \leq 0.0001$ , ns = not significant.

53

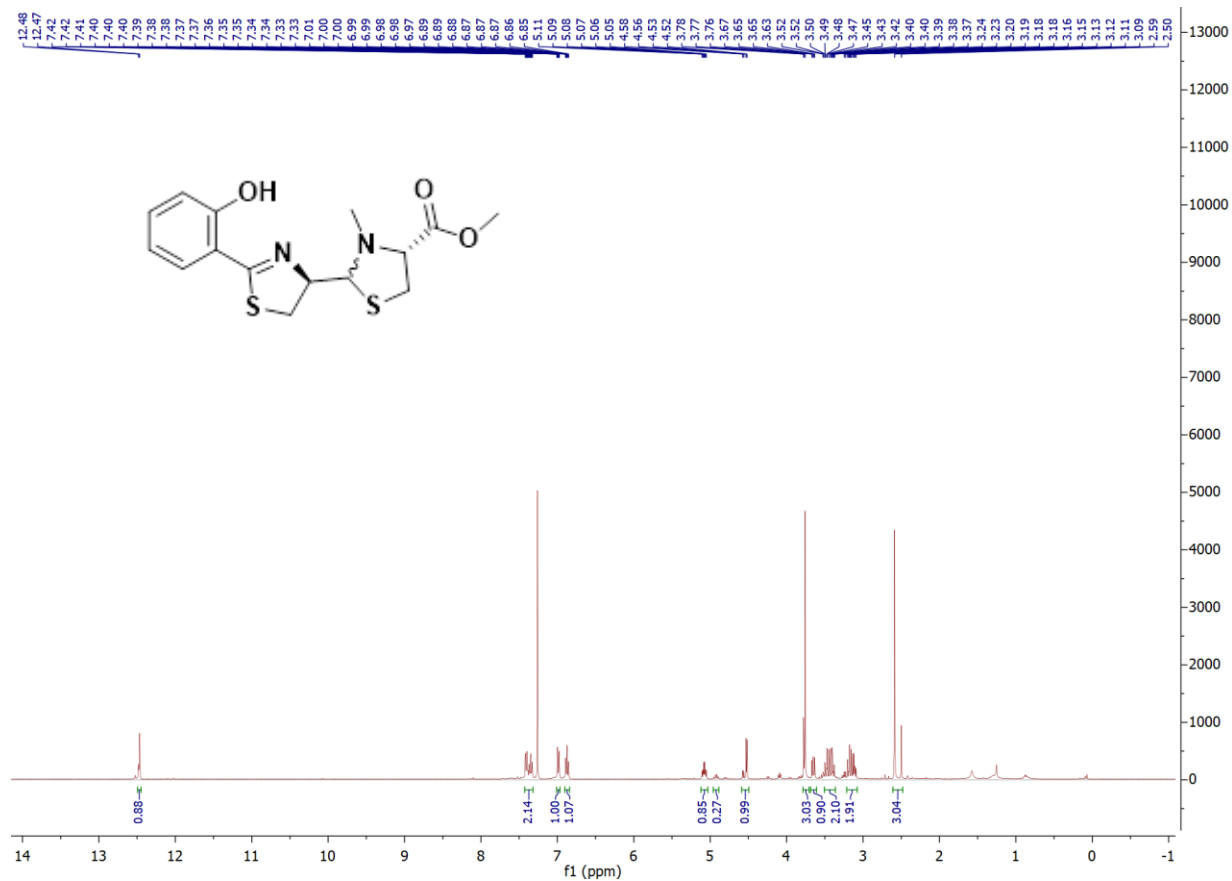

54

55 **Figure S5:** <sup>1</sup>H NMR of MetPch (400 MHz, Chloroform-*d*). Related to STAR Methods.  
 56 [Major Isomer] δ 12.47 (s, 1H), 7.43 – 7.32 (m, 2H), 6.99 (ddd, *J* = 8.3, 3.4, 1.2 Hz, 1H),  
 57 6.87 (td, *J* = 7.6, 1.2 Hz, 1H), 5.08 (td, *J* = 8.8, 5.1 Hz, 1H), 4.52 (d, *J* = 5.2 Hz, 1H),  
 58 3.76 (s, 3H), 3.65 (dd, *J* = 9.2, 6.3 Hz, 1H), 3.51 – 3.36 (m, 2H), 3.22 – 3.08 (m, 2H),  
 59 2.59 (s, 3H).

60



61

62 **Table S1:** Primer used in this study. Related to STAR Methods.

| <b>primer name</b>         | <b>primer sequence</b>               |
|----------------------------|--------------------------------------|
| <b>construction primer</b> |                                      |
| spm_up_fw_KpnI             | ccccggtacCGTGTTCCAGCATCTGTCGAT       |
| spm_up_rv_NcoI             | ggggccatggTTTTGCTCGAGCTATCAAAGG      |
| spm_dw_fw_NcoI             | ggggccatggGTTCCAAAGAGACAGAGACATTAAG  |
| spm_dw_rv_Sall             | ccccgtcgacGGCTACTGCTGGCGAAGA         |
| fhuD1_up_fw_KpnI           | ccccggtaccAGAGGGGCACCACCAATAA        |
| fhuD1_up_rv_NcoI           | ggggccatggATCGACAGATGCTGAACACG       |
| fhuD1_dw_fw_NcoI           | ggggccatggGAAGATTATTGGTTCACAGATCCT   |
| fhuD1_dw_rv_Sall           | ccccgtcgacTCCCTAGAAAACAGCAGCTCA      |
| fhuD2_up_fw_EcoRI          | ccccgaattcAGTAAAGCGCCAAATGGTTG       |
| fhuD2_up_rv_KpnI           | ccccggtaccTTTCATAATTTCTCCTATTGAAAATG |
| fhuD2_dw_fw_KpnI           | ccccggtaccGCTGGTACATACTGGTACAACGA    |
| fhuD2_up_fw_KpnI_new       | ccccggtaccAGTAAAGCGCCAAATGGTTG       |
| fhuG_up_fw_EcoRI           | ccccgaattcTTTGCTGGATTTTTAGGTGCT      |
| fhuG_up_rv_NcoI            | ggggccatggTGCTATCAATTGTCTGCGTTT      |
| fhuG_dw_fw_NcoI            | ggggccatggATTGGTGCACCGTATTTCTT       |
| fhuG_dw_rv_Sall            | ccccgtcgacCCTTCCATTTCTGCAAGCTC       |
| pchF_up_fw_XbaI            | cccctctagaCGCGCCTGCTCGAAG            |
| pchF_up_rv_HindIII         | ccccaaagcttCTCGCTCCAGAGTTTCGATG      |
| pchF_dwn_fw_HindIII        | ccccaaagcttCTGGCGCAATCCTTGTC         |
| pchF_dwn_rv_EcoRI          | ccccgaattCTCCAGCACCTGTTCCAG          |
| pch_up_fw_EcoRI            | ccccgaattCACTGCCTTCAACCTGCTC         |
| pch_up_rv_NcoI             | ggggccatggGTCGCCTGAAAACGAAGAC        |
| pch_dwn_fw_NcoI            | ggggccatggGCGGGCGAGGAAAGTT           |
| pch_dwn_rv_XbaI            | cccctctagaCGGTAGGTGTCCCACCTTGA       |
| pvdI_up_fw_XbaI            | ggggctcGATGCCGTCGTTGGTCAG            |
| pvdI_up_rv_NcoI            | ggggccatggACGCTTCTCAACGGGTAGTT       |
| pvdI_dw_fw_NcoI            | ggggccatggAGCGAACTAGAGGCGATCTG       |
| pvdI_dw_rv_EcoRI           | ccccgaattcTGAACATGGTCACACCCTTG       |
|                            |                                      |
| <b>colony PCR primer</b>   |                                      |
| fhuD2_chrom_col_fw         | TGCCGATAATTGGGACGTAT                 |
| fhuD2_chrom_col_rv         | GCATGCATACGCCATTCTTT                 |
| fhuG_chrom_col_fw          | TTCAGGTGCTTCATTTGCTTT                |
| fhuG_chrom_col_rv          | ACGCTTCTACACGCGATTTT                 |

|                                      |                                            |
|--------------------------------------|--------------------------------------------|
| spm_chrom_col                        | CCCCCTTTTCAACTGACAGA                       |
| fhuD1_chrom_col                      | CAAAAATAAACGCAACTGCAA                      |
| pch_chrom_col_up                     | CTGATCCTCCACGCCATC                         |
| pch_chrom_col_dwn                    | ATCGGCTTCCTGGTATTCG                        |
| pchF_chrom_col_up                    | CTCGACGAGGCGTTGC                           |
| pchF_chrom_col_dwn                   | CGATAGGTGCGCAGCAG                          |
| pvdI_chrom_col_up                    | TTGCCGGTATAAGGGTTCAG                       |
| pvdI_chrom_col_dwn                   | GCCTGGTGATTGAACATGAC                       |
| HC479                                | AGAAAAGCTTGCATTTTATTGAGAA                  |
| HC480                                | TTCAATAATTGTTCCATAACCACA                   |
|                                      |                                            |
| <b>mutant complementation primer</b> |                                            |
| spm_KI_up_fw_short_KpnI              | ccccggtaccGGATTGAAGAGTGGGACGAT             |
| spm_KI_up_rv_NcoI_NcoI_Sall          | cccgcgtcgacatatccatggTCCCTAGAAAACAGCAGCTCA |
| spm_KI_dw_fw_NcoI                    | ggggccatggTGTCCCATTCCTTTTACGAGA            |
| spm_KI_dw_rv_short_Sall              | cccgcgtcgaCAAGCAATCACCGACCTGTA             |
|                                      |                                            |
| <b>sequencing primer</b>             |                                            |
| fhuD2_dw_seq                         | GTGCCGTTGTTATCGTTCAAT                      |
| fhuD2_up_seq                         | TGCTGCATCTTCCATAGGTG                       |
| fhuG_dw_seq                          | ACTCTGGGTGCGCAATTAAC                       |
| spm_seq1                             | CATCAAAATACATCAATACACCTTCA                 |
| spm_seq2                             | CCAGAATCAATAGAAATACGAAAAA                  |
| pchF_seq_up                          | CGGATCGCCCTGGTC                            |
| pchF_seq_dwn                         | GTCCAGGGTGGCGAAAC                          |
| pchcl_seq_up                         | ACAGGAGCGCACCGAAT                          |
| pchcl_seq_dwn                        | TCGTGAGGCTGAACAGATT                        |
| pvdI_up_seq1                         | GACGATCAGGACGAAGAACC                       |
| pvdI_dwn_seq1                        | CAATCGCTGTTGTCGAGT                         |
|                                      |                                            |
| <b>plasmid primer</b>                |                                            |
| pGPI_F                               | AGCTGATCCGGTGGATGAC                        |
| pGPI_R                               | ACGGTTGTGGACAACAAGC                        |
|                                      |                                            |
| <b>pRT-PCR primer</b>                |                                            |
| KK23 (gyrB_fw)                       | AACGGACGTGGTATCCCAGTTGAT                   |
| KK24 (gyrB_rv)                       | CCGCCAAATTTACCACCAGCATGT                   |
| KK55 (spm_fw)                        | GTGTTACTAAGAGGCTTATCAAGGA                  |
| KK56 (spm_rv)                        | ACCTTGATCTAAGCCACAACC                      |

|                 |                               |
|-----------------|-------------------------------|
| KK63 (fhuD1_fw) | <u>GGTCAAGCAACAGCATCTG</u>    |
| KK64 (fhuD1_rv) | <u>GAACAATATCCAAACCACGACC</u> |

Restriction sites are underlined

64 **Table S2:** Solvents used for solvent screen. Related to STAR Methods.

|            |                                                    |
|------------|----------------------------------------------------|
| solvent 1  | dimethyl formamide                                 |
| solvent 2  | dichloromethane                                    |
| solvent 3  | ethyl acetate                                      |
| solvent 4  | ethyl acetate + 0.1 % formic acid                  |
| solvent 5  | methanol                                           |
| solvent 6  | water                                              |
| solvent 7  | acetonitrile + water (1:1)                         |
| solvent 8  | acetonitrile + water (1:1) + 0.1% formic acid      |
| solvent 9  | dimethyl formamide + water                         |
| solvent 10 | dimethyl formamide + water + 0.1 % formic acid     |
| solvent 11 | Methanol + water (1:1) + 0.1% formic acid          |
| solvent 12 | ethyl acetate + methanol (1:1)                     |
| solvent 13 | ethyl acetate + methanol (1:1) + 0.1 % formic acid |
| solvent 14 | n-Butanol                                          |
| solvent 15 | n-Butanol + 0.1% formic acid                       |

65

66
